# Supplementary material for: Visual Measurement of Fumonisin B1 with Bipolar Electrodes Array-Based Electrochemiluminescence Biosensor
Source: MDPI journal article supplement (doi:10.3390/chemosensors11080451), 2023-08-12
Supplement: s1 [file s1]

Archive with 1 entries (1 files):
- chemosensors-2525337-supplementary.pdf
