# Supplementary material for: Visual Measurement of Fumonisin B1 with Bipolar Electrodes Array-Based Electrochemiluminescence Biosensor
Source: MDPI journal article supplement (doi:10.3390/chemosensors11080451), 2023-08-12
Supplement: s1 [file s1 › chemosensors-2525337-supplementary.pdf]

Supplementary

# Visual Measurement of Fumonisin B<sub>1</sub> with Bipolar Electrodes Array-Based Electrochemiluminescence Biosensor

Longsheng Jin, Huihui Yu, Weishuai Liu, Ziying Xiao, Haijian Yang, Bing Jin and Meisheng Wu \*

Department of Chemistry, College of Sciences, Nanjing Agricultural University, 1 Weigang, Nanjing 210095, China

\* Correspondence: wumeisheng@njau.edu.cn

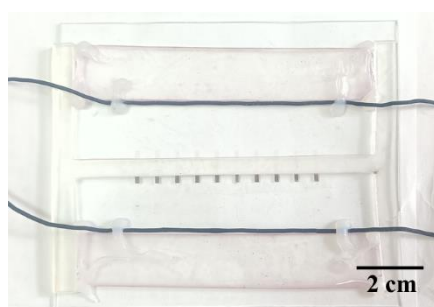

Figure S1. BPEs array-ECL device.

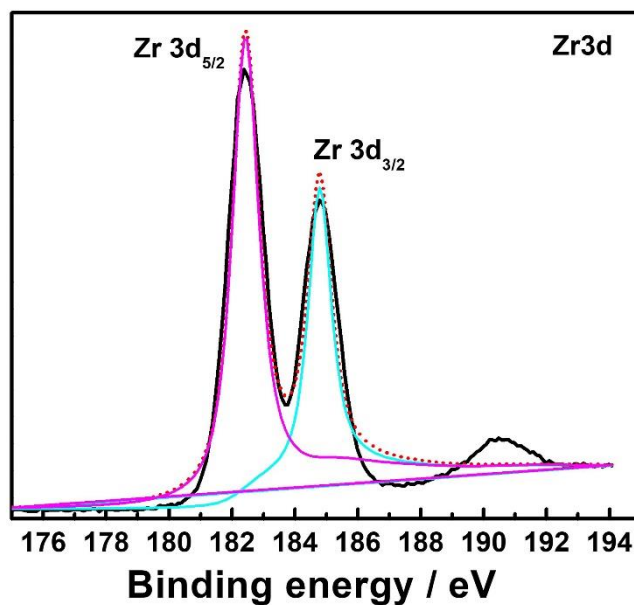

Figure S2. High-resolution Zr 3d XPS spectra of MB@Zr-MOFs.

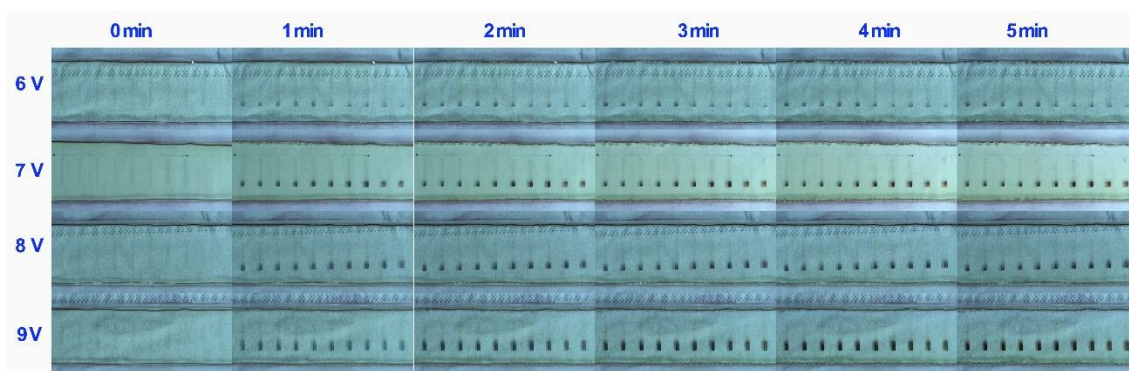

**Figure S3.** Optical images of ITO electrode array during the deposition of Au NPs. The deposition voltage was 6, 7, 8, and 9 V.

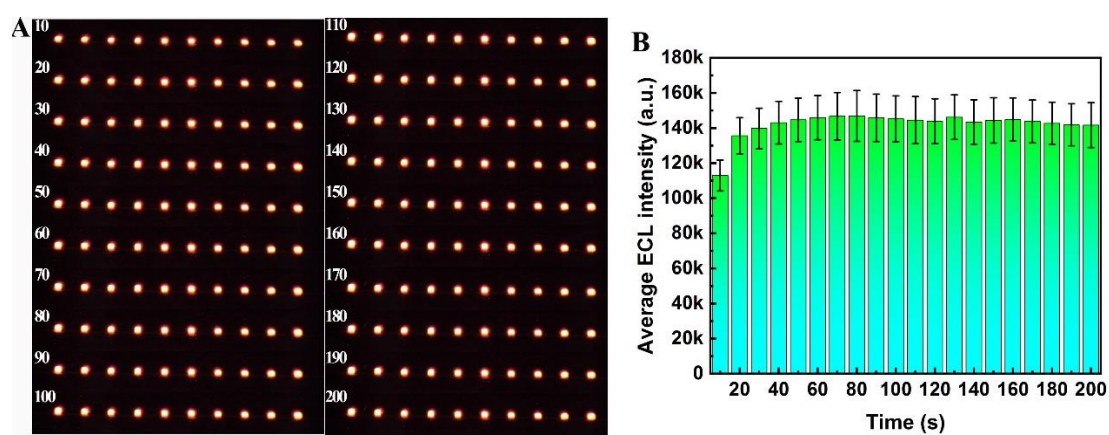

**Figure S4.** (A) ECL images captured on ITO BPES array under different time and (B) the average ECL intensity-time curve.
